# Supplementary material for: The impact of perceived risk, screening eligibility and worry on preference for lung cancer screening: a cross-sectional survey
Source: PubMed Central journal article supplement — ERJ Open Res. 2020 Mar 16;6(1):00158-2019. doi: 10.1183/23120541.00158-2019 (PMC7073421; doi:10.1183/23120541.00158-2019), 2020-03-16
Supplement: 00158-2019.SUPPLEMENT.pdf [file 00158-2019.SUPPLEMENT.pdf]

Thank you for participating in our survey. Please tick the appropriate response.

Q1. Have you ever regularly smoked cigarettes? Yes No

If you have NEVER SMOKED CIGARETTES, STOP HERE. Do not complete the rest of the form.

Q2. Have you ever been diagnosed with lung cancer? Yes No

IF YOU HAVE BEEN DIAGNOSED WITH LUNG CANCER, STOP HERE. Do not complete the rest of the form.

Q3. What is your age? \_\_\_\_\_ years old

You must be aged between 55-80 to complete this survey.

IF YOU ARE LESS THAN 55 YEARS OLD OR MORE THAN 80 YEARS OLD, STOP HERE. Do not complete the rest of the form.

Q4. What is your gender? tick one Male Female

Q5. What is the highest level of education that you have completed? tick one

- Less than end of high school
- End of high school
- Certificate III or IV (TAFE)
- Diploma or Advanced Diploma
- Bachelors University Degree
- Postgraduate degree (Masters or PhD)

Q6. What best describes your current employment? tick one

- In paid employment or self-employed
- Retired – self funded or “Senior”
- Retired – Pensioner
- Unable to work due to sickness or disability
- Unemployed and looking for work
- Doing unpaid or voluntary work
- Looking after home and/or family
- None of the above

Q7. What postcode do you live in? (optional question) \_\_\_\_\_

Q8. In general, compared to others your age, would you say your health is: Tick one

- Excellent
- Very Good
- Good
- Fair
- Poor

Q9. What is your race or ethnicity? Tick one

- White / Caucasian
- Asian
- African
- Middle Eastern/ North African
- Subcontinent
- Aboriginal or Torres Strait Islander
- Maori or Pacific Islander
- Other \_\_\_\_\_

Q10. How old were you when you started smoking regularly? \_\_\_\_\_ years old

Q11. Are you still smoking now, even one puff in the last month?  Yes  No  
go to Q13      go to Q12

Q12. If you have quit smoking, how old were you when you quit for good? \_\_\_\_\_ years old

Q13. On average, how many cigarettes per day have you smoked? \_\_\_\_\_ cigarettes per day

Q14. Next are statements that current and former smokers have said about quitting.

Which statement best represents what you think right now. Tick one

- I have quit and I am 100% confident that I will never smoke again
- I have already quit but I worry about slipping back or relapsing
- I have already begun to cut down and I have set a quit date
- I plan to quit in the next 30 days
- I plan to quit in the next 6 months
- I often think about quitting but have no specific plans to quit
- I sometimes think about quitting but have no specific plans to quit
- I rarely think about quitting and have no specific plans to quit
- I never think about quitting but I might someday
- I enjoy smoking so much I will never consider quitting no matter what happens

Q15. Have any of your parents, siblings or children ever been diagnosed with lung cancer?

- Do not include mesothelioma  Yes Go to 15a  No Go to 16

Q15a. If yes, how old were they when they were diagnosed?

Less than 60 years old  More than 60 years old

Q16. Have you ever been told by a doctor or a nurse that you have any of the following illnesses?

Emphysema, Chronic Bronchitis or COPD  Yes  No

Any cancer including melanoma  Yes  No

(Do not include other skin cancers such as SCCs or BCCs)

Pneumonia as an adult  Yes  No

Tuberculosis or TB  Yes  No

Q17. What is your weight? \_\_\_\_\_ kg **OR** \_\_\_\_\_ stone

Q18. What is your height? \_\_\_\_\_cm **OR** \_\_\_\_\_feet and\_\_\_\_\_ inch

Q19. Have you worked in a job for more than three months where you were exposed to asbestos?  Yes  No

Q20. For females only, have you had a mammogram for breast cancer screening in the last 2 years?  Yes  No

Q21. Have you returned a faecal occult blood test (FOBT) for bowel cancer screening in the last 2 years?  Yes  No

We would like to know your opinions about risk and lung cancer. For each question, please tick the response that best fits your opinion.

Q 22. How likely do you think it is that you will develop lung cancer in your lifetime? Tick one

Very unlikely       Somewhat Unlikely       Not likely or unlikely       Somewhat likely       Very likely

Q 23. I am in danger of developing lung cancer because I do/used to smoke Tick one

Strongly disagree       Disagree       Neither agree or disagree       Agree       Strongly Agree

Q 24. Compared to others your age and sex, what do you think is the chance of getting lung cancer in your lifetime? Tick one

Much lower       Slightly lower       About the same       Slightly higher       Much higher

Q 25. I am in more danger of developing lung cancer that the average person. Tick one

Strongly disagree       Disagree       Neither agree or disagree       Agree       Strongly Agree

Q 26. Among 100 smokers, how many will get lung cancer because they smoke? Tick one

0     10     20     30     40     50     60     70     80     90     100

Q 27. How *worried* are you about getting lung cancer in your lifetime? Tick one

Not at all       A little       Somewhat       Extremely

Q 28. How *often* do you worry about getting lung cancer? Tick one

Not at all       Sometimes       Often       All of the time

Q 29. How *serious* would the health consequences be if you developed lung cancer? Tick one

Not at all serious      A little serious      Somewhat serious      Quite serious      Extremely serious

                                                                                      

Q 30. For current smokers only: Compared to other smokers, what do you think your chance of getting lung cancer is in your lifetime? Tick one for each disease listed

Much lower      Slightly Lower      About the same      Slightly higher      Much higher

                                                                                      

Q 31. For former smokers only: Compared to other former smokers, what do you think your chance of getting lung cancer is in your lifetime? Tick one

Much lower      Slightly Lower      About the same      Slightly higher      Much higher

                                                                                      

Q 32. How much do you agree with the following statement?

“I want to know if I have the following...” Tick one on each row.

|                                                                                                  | Strongly Disagree     | Disagree              | Neutral               | Agree                 | Strongly Agree        | I already have this disease |
|--------------------------------------------------------------------------------------------------|-----------------------|-----------------------|-----------------------|-----------------------|-----------------------|-----------------------------|
| Early lung cancer                                                                                | <input type="radio"/> | NA                          |
| Early emphysema                                                                                  | <input type="radio"/>       |
| Early hardening of the heart arteries<br>This can increase the chance of heart attacks or stroke | <input type="radio"/>       |
| A genetic risk for lung cancer                                                                   | <input type="radio"/>       |

The next questions are about lung cancer screening. Read the information below about lung cancer screening and then complete the questions.

Screening of selected heavy current and former smokers aged between 55 and 80 years old for lung cancer is recommended in the USA and Canada but is NOT currently recommended in Australia. The screening test is a CT or CAT scan of the chest. If you currently smoke, staff at the program would also help you to quit smoking.

Lung cancer screening can save lives, but there are possible harms or bad things. These include possible false alarms, increased exposure to radiation from the CT scans, cancers missed by the scan, inconvenience having the tests and stress or worry about the result.

Screening is provided to those at highest risk for lung cancer when the benefits outweigh the harms. Screening is not for individuals at lower risk for lung cancer because the harms may be greater than the benefits.

How strongly do you agree or disagree with the following statements?  
Tick one circle between 1 and 10. 1 is strongly disagree. 10 is strongly agree

Q 33. I want screening because I think it is better to find cancer early. Tick one

|                       |                       |                       |                       |                       |                       |                       |                       |                       |                       |                |
|-----------------------|-----------------------|-----------------------|-----------------------|-----------------------|-----------------------|-----------------------|-----------------------|-----------------------|-----------------------|----------------|
| Strongly disagree     |                       |                       |                       |                       | Neutral               |                       |                       |                       |                       | Strongly agree |
| 1                     | 2                     | 3                     | 4                     | 5                     | 6                     | 7                     | 8                     | 9                     | 10                    |                |
| <input type="radio"/> |                |

Q 34. I want screening to get “peace of mind” or reassurance that I DO NOT have lung cancer. Tick one

|                       |                       |                       |                       |                       |                       |                       |                       |                       |                       |                |
|-----------------------|-----------------------|-----------------------|-----------------------|-----------------------|-----------------------|-----------------------|-----------------------|-----------------------|-----------------------|----------------|
| Strongly disagree     |                       |                       |                       |                       | Neutral               |                       |                       |                       |                       | Strongly agree |
| 1                     | 2                     | 3                     | 4                     | 5                     | 6                     | 7                     | 8                     | 9                     | 10                    |                |
| <input type="radio"/> |                |

2

Q 35. I want screening to reduce the chance that I will die from lung cancer. Tick one

|                       |                       |                       |                       |                       |                       |                       |                       |                       |                       |                |
|-----------------------|-----------------------|-----------------------|-----------------------|-----------------------|-----------------------|-----------------------|-----------------------|-----------------------|-----------------------|----------------|
| Strongly disagree     |                       |                       |                       |                       | Neutral               |                       |                       |                       |                       | Strongly agree |
| 1                     | 2                     | 3                     | 4                     | 5                     | 6                     | 7                     | 8                     | 9                     | 10                    |                |
| <input type="radio"/> |                |

Q 36. I DO NOT want screening because I have too many other medical problems for lung cancer screening to be worthwhile. Tick one

|                       |                       |                       |                       |                       |                       |                       |                       |                       |                       |                |
|-----------------------|-----------------------|-----------------------|-----------------------|-----------------------|-----------------------|-----------------------|-----------------------|-----------------------|-----------------------|----------------|
| Strongly disagree     |                       |                       |                       |                       | Neutral               |                       |                       |                       |                       | Strongly agree |
| 1                     | 2                     | 3                     | 4                     | 5                     | 6                     | 7                     | 8                     | 9                     | 10                    |                |
| <input type="radio"/> |                |

Q 37. I DO NOT want screening because I am worried about the radiation from the CT scans. Tick one

|                       |                       |                       |                       |                       |                       |                       |                       |                       |                       |                |
|-----------------------|-----------------------|-----------------------|-----------------------|-----------------------|-----------------------|-----------------------|-----------------------|-----------------------|-----------------------|----------------|
| Strongly disagree     |                       |                       |                       |                       | Neutral               |                       |                       |                       |                       | Strongly agree |
| 1                     | 2                     | 3                     | 4                     | 5                     | 6                     | 7                     | 8                     | 9                     | 10                    |                |
| <input type="radio"/> |                |

Q 38. I DO NOT want screening because I don't want to find a cancer that, if it was left alone, it would never have harmed me. This is called Over-Diagnosis. Tick one

|                       |                       |                       |                       |                       |                       |                       |                       |                       |                       |                |
|-----------------------|-----------------------|-----------------------|-----------------------|-----------------------|-----------------------|-----------------------|-----------------------|-----------------------|-----------------------|----------------|
| Strongly disagree     |                       |                       |                       |                       | Neutral               |                       |                       |                       |                       | Strongly agree |
| 1                     | 2                     | 3                     | 4                     | 5                     | 6                     | 7                     | 8                     | 9                     | 10                    |                |
| <input type="radio"/> |                |

Q 39. I DO NOT want screening because I would be too worried, anxious or stressed about the results of the CT scan. Tick one

|                       |                       |                       |                       |                       |                       |                       |                       |                       |                       |                |
|-----------------------|-----------------------|-----------------------|-----------------------|-----------------------|-----------------------|-----------------------|-----------------------|-----------------------|-----------------------|----------------|
| Strongly disagree     |                       |                       |                       |                       | Neutral               |                       |                       |                       |                       | Strongly agree |
| 1                     | 2                     | 3                     | 4                     | 5                     | 6                     | 7                     | 8                     | 9                     | 10                    |                |
| <input type="radio"/> |                |

Q 40. I DO NOT want screening because it would be too hard for me to travel to have the CT scan. The scan would be at the nearest hospital or Xray clinic with a CT machine. Tick one

|                       |                       |                       |                       |                       |                       |                       |                       |                       |                       |                |
|-----------------------|-----------------------|-----------------------|-----------------------|-----------------------|-----------------------|-----------------------|-----------------------|-----------------------|-----------------------|----------------|
| Strongly disagree     |                       |                       |                       |                       | Neutral               |                       |                       |                       |                       | Strongly agree |
| 1                     | 2                     | 3                     | 4                     | 5                     | 6                     | 7                     | 8                     | 9                     | 10                    |                |
| <input type="radio"/> |                |

Q 41. I DO NOT want screening because I feel I am “too old” for lung cancer screening. Tick one

|                       |                       |                       |                       |                       |                       |                       |                       |                       |                       |                |
|-----------------------|-----------------------|-----------------------|-----------------------|-----------------------|-----------------------|-----------------------|-----------------------|-----------------------|-----------------------|----------------|
| Strongly disagree     |                       |                       |                       |                       | Neutral               |                       |                       |                       |                       | Strongly agree |
| 1                     | 2                     | 3                     | 4                     | 5                     | 6                     | 7                     | 8                     | 9                     | 10                    |                |
| <input type="radio"/> |                |

Q 42. I DO NOT want screening because it would be too hard for me to have lung cancer screening because of work or other time commitments. Tick one

|                       |                       |                       |                       |                       |                       |                       |                       |                       |                       |                |
|-----------------------|-----------------------|-----------------------|-----------------------|-----------------------|-----------------------|-----------------------|-----------------------|-----------------------|-----------------------|----------------|
| Strongly disagree     |                       |                       |                       |                       | Neutral               |                       |                       |                       |                       | Strongly agree |
| 1                     | 2                     | 3                     | 4                     | 5                     | 6                     | 7                     | 8                     | 9                     | 10                    |                |
| <input type="radio"/> |                |

Q 43. For current smokers only: I would want to get screened to get help to quit smoking.  
 If you have already quit smoking, go to Q43. Tick one

|                       |                       |                       |                       |                       |                       |                       |                       |                       |                       |                |
|-----------------------|-----------------------|-----------------------|-----------------------|-----------------------|-----------------------|-----------------------|-----------------------|-----------------------|-----------------------|----------------|
| Strongly disagree     |                       |                       |                       |                       | Neutral               |                       |                       |                       |                       | Strongly agree |
| 1                     | 2                     | 3                     | 4                     | 5                     | 6                     | 7                     | 8                     | 9                     | 10                    |                |
| <input type="radio"/> |                |

Q 44. I would be disappointed if I was told that I was NOT eligible for lung cancer screening. Tick one

|                       |                       |                       |                       |                       |                       |                       |                       |                       |                       |                |
|-----------------------|-----------------------|-----------------------|-----------------------|-----------------------|-----------------------|-----------------------|-----------------------|-----------------------|-----------------------|----------------|
| Strongly disagree     |                       |                       |                       |                       | Neutral               |                       |                       |                       |                       | Strongly agree |
| 1                     | 2                     | 3                     | 4                     | 5                     | 6                     | 7                     | 8                     | 9                     | 10                    |                |
| <input type="radio"/> |                |

Q 45. Overall, I would have lung cancer screening if it was offered to me. Tick one

|                       |                       |                       |                       |                       |                       |
|-----------------------|-----------------------|-----------------------|-----------------------|-----------------------|-----------------------|
| Strongly disagree     | Disagree              | Neutral               |                       | Agree                 | Strongly Agree        |
| <input type="radio"/> |

We would like your best contact details in case you have accidentally missed a question.

We will only use this information to contact you if a question was missed.

You do not have to give us your details if you don't want to.

Name:

Phone number:

Best time to call:      Morning              Afternoon              Evening
